# Supplementary material
Source: PubMed Central journal article supplement (PMC3194767)

## Supplementary Materials and Methods

### Deep sequencing primer design.

The following primer pairs were used (in different combinations) to amplify the different regions in C-terminal *AKD*. Forward A-Tag and reverse B-Tag sequences are shown in black and *AKD* sequences are in red. Nucleotide co-ordinates are noted in the primer name and lengths of *AKD* sequence captured in each amplicon are shown in parentheses.

Akd\_2674\_A: 5'-GCCTCCCTCGCGCCATCAG**TTGGAAGAAAGATTAGGC**-3'

Akd\_2714\_B: 5'-GCCTTGCCAGCCCGCTCAG**CTTTTGTATTTATGTGGATATGTA**-3'

(41bp)

Akd\_2786\_A: 5'-GCCTCCCTCGCGCCATCAG**GGAAACTGCACTGCAAACAAG**-3'

Akd\_2847\_B: 5'-GCCTTGCCAGCCCGCTCAG**TCTCACATCTTCACCTTCCTC**-3'

(62bp)

Akd\_2712\_A: 5'-GCCTCCCTCGCGCCATCAG**TCCCAGGGGACAATTGAAAGA**-3'

Akd\_2786\_B: 5'-GCCTTGCCAGCCCGCTCAG**CCTCAGTCCCTTCTTCCCCA**-3'

(75bp)

Akd\_2712\_A: 5'-GCCTCCCTCGCGCCATCAG**TCCCAGGGGACAATTGAAAGA**-3'

Akd\_2764\_B: 5'-GCCTTGCCAGCCCGCTCAG**CTTGTTGCAGTGCAGTTTCC**-3'

(53bp)

Akd\_2888\_A: 5'-GCCTCCCTCGCGCCATCAG**CGTCTTCCATGTATGCACC**-3'

Akd\_2949\_B: 5'-GCCTTGCCAGCCCGCTCAG**CAGCTGGGCCTCAATGTCCAC**-3'

(62bp)

Akd\_2823\_A: 5'-GCCTCCCTCGCGCCATCAG**ACTGAGGAAGACACAGAGGAAAA**-3'

Akd\_2891\_B: 5'-GCCTTGCCAGCCCGCTCAG**GGTCAACACACACTTGGTGG**-3'

(69bp)

Akd\_2674'\_A: 5'-GCCTCCCTCGCGCCATCAG**CATTTGGAAGAAAGATTAGGC**-3'

Akd\_2763'\_B: 5'-GCCTTGCCAGCCCGCTCAG**TTGTTTGCAGTGCAGTTTCCT**-3'

(90bp)

Akd\_2820'\_A: 5'-GCCTCCCTCGCGCCATCAG**GACTGAGGAAGACACAGAGGAAAA**-3'

Akd\_2869'\_B: 5'-GCCTTGCCAGCCCGCTCAG**AAGGTGCATACATGGAAGACG**-3'

(50bp)

Akd\_2740'\_A: 5'-GCCTCCCTCGCGCCATCAG**GTACATATCCACATAAATACAAAAAG**-3'

Akd\_2786'\_B: 5'-GCCTTGCCAGCCCGCTCAG**CCTCAGTCCCTTCTTCCCA**-3'

(47bp)

Akd\_2833'\_A: 5'-GCCTCCCTCGCGCCATCAG**CACAGAGGAAAAATGTAATC**-3'

Akd\_2891'\_B: 5'-GCCTTGCCAGCCCGCTCAG**GGTCAACACACACTTGGTGG**-3'

(59bp)

Akd\_2868'\_A: 5'-GCCTCCCTCGCGCCATCAG**TTAGAGGAAGGTGAAGATGTGAG**-3'

Akd\_2916'\_B: 5'-GCCTTGCCAGCCCGCTCAG**GCACTTCTTATTGGTAACCAA**-3'

(49bp)

Akd\_2724'\_A: 5'-GCCTCCCTCGCGCCATCAG**GACAATTGAAAGATGTACATATCC**-3'

Akd\_2793'\_B: 5'-GCCTTGCCAGCCCGCTCAG**TGTGTCTTCTCAGTCCCTTC**-3'

(71bp)

**Construction of point mutations and deletions of AKD.** The following primers were used

|                                       |               |              |               |     |
|---------------------------------------|---------------|--------------|---------------|-----|
| for                                   | site-directed | mutagenesis: | Gln_STOP-For: | 5'- |
| CAATCGTGGAGCATCCTAGGGGACAATTGAAAG-3'; |               |              | Gln_STOP-Rev: | 5'- |
| CTTTCAATTGTCCCCTAGGATGCTCCACGATTG-3'; |               |              | Pro_Ser-For:  | 5'- |
| GAAAGATGTACATATTCACATAAATACAAAA-3';   |               |              | Pro_Ser-Rev:  | 5'- |
| TTTTGTATTTATGTGAATATGTACATCTTTC-3';   |               |              | Asp_Asn-For:  | 5'- |
| ATTTTCCTCTGTGTTTTTCCTCAGTCCCTTC-3';   |               |              | Asp_Asn-Rev:  | 5'- |
| ATTTTCCTCTGTGTTTTTCCTCAGTCCCTTC-3';   |               |              | Thr_Ile-For:  | 5'- |

CAGAGGAAAAATGTATTATCTG-3' and Thr\_Ile-Rev: 5'-ATAGACAAACAGATAATACATTTTTTCCTCTG-3'. Fragments were subsequently PCR amplified and cloned in-frame into the expression plasmid pTriex2-GFP as *XhoI*-digested products using the following primer pair: 5'-GTCTCGAGCTTCTCAATGGACTCCTGAATAT-3' and 5'-GTCTCGAGTCAACTTTCACTTGGCAGCTG-3'. The  $\Delta$ RING and  $\Delta$ NRG deletions of Arkadia were generated as previously described (1). The  $\Delta$ TIER mutation was constructed by PCR and consists an internal deletion of the seven amino acids directly after the NRG domain.

**RNA/Protein extraction from colon tissue and tumors.** Tissue was simultaneously lysed and homogenized in buffer RLT (Qiagen) using a TissueLyser II machine (Qiagen). RNA and protein was subsequently extracted using the AllPrep RNA/Protein mini kit (Qiagen). Protein was resuspended in 5% SDS and quantified using the BCA assay kit (Pierce). Determination of RNA concentration/purity and cDNA synthesis was performed as previously described (2).

**Quantitative PCR (qPCR).** qPCR was performed as previously described (3). Primer sequences for human *SNON* and Alu repeats, and mouse *Akd*, *SnoN*, *p21*, *p15*, *Pai-1*, *Tmepai*, *Smad7*, *c-Myc*, *Histone H3* are as follows: *SNON*-For: 5'-GGCTGAATATGCAGGACAG-3'; *SNON*-Rev: 5'-TGAGTTCATCTTGGAGTTCTTG-3'; Alu-For: 5'-CATGGTGAAACCCCGTCTCTA-3'; Alu-Rev: 5'-GCCTCAGCCTCCCGAGTAG-3'; *Akd*-For: 5'-CCCATCCACATAGGATGCAC-3'; *Akd*-Rev: 5'-CAGTCCCAGGCAGTTCTCT-3'; *SnoN*-For: 5'-TCCAATCAAAGACAGATACACCA-

3'; *SnoN*-Rev: 5'-CTGGGGTGTA AAAAATGAATGTG-3'; *p21<sup>WAF</sup>*-For: 5'-CAGACATTCAGAGCCACAGG-3'; *p21<sup>WAF</sup>*-Rev: 5'-GCGCAACTGCTCACTGTC-3'; *p15<sup>INK4b</sup>*-For: 5'-AGATCCCAACGCCCTGAAC-3'; *p15<sup>INK4b</sup>*-Rev: 5'-TCGTGCACAGGTCTGGTAAG-3'; *Pai-1*-For: 5'-TCCTGCCTAAGTTCTCTCTGG-3'; *Pai-1*-Rev: 5'-CTGCTCTTGGTCGGAAAGAC-3'; *Tmepai*-For: 5'-GGAGATCACGGAGCTGGAGT-3'; *Tmepai*-Rev: 5'-CAGCTTG TAGTGGCTCAGCA-3'; *Smad7*-For: 5'-GAAACCGGGGGAACGAATTAT-3'; *Smad7*-Rev: 5'-CGCGAGTCTTCTCCTCCCA-3'; *c-Myc*-For: 5'-GCGACTCTGAAGAAGAGCAAG-3'; *c-Myc*-Rev: 5'-GATGGAGATGAGCCCGACT-3'; *H3*-For: 5'-CGTTACAGGCCTGGTACTGTG-3' and *H3*-Rev: 5'-TCTGTTTTGAAGTCCTGAGCAA-3'.

## References

1. Mavrakis KJ, Andrew RL, Lee KL, Petropoulou C, Dixon JE, Navaratnam N, et al. Arkadia enhances Nodal/TGF-beta signaling by coupling phospho-Smad2/3 activity and turnover PLoS Biol 2007;5:e67.
2. Guzman-Ayala M, Lee KL, Mavrakis KJ, Goggolidou P, Norris DP, Episkopou V. Graded Smad2/3 activation is converted directly into levels of target gene expression in embryonic stem cells PLoS One 2009;4:e4268.
3. Nagano Y, Mavrakis KJ, Lee KL, Fujii T, Koinuma D, Sase H, et al. Arkadia induces degradation of SnoN and c-Ski to enhance transforming growth factor-beta signaling J Biol Chem 2007;282:20492-501.

## Supplementary Table S1.

| Patient | Nucleotide change | Amino acid change | Frequency (%) | Reads |
|---------|-------------------|-------------------|---------------|-------|
| 6       | 2695 (CAG>TAG)    | Q899STOP          | 2.76          | 4167  |
| 6       | 2717 (ACA>ATA)    | T906I             | 4.58          | 4167  |
| 6       | 2722 (CCA>TCA)    | P908S             | 9.94          | 4167  |
| 6       | 2725 (CAT>TAT)    | H909Y             | 3.31          | 4167  |
| 6       | 2773 (CAC>TAC)    | H925Y             | 3.26          | 6857  |
| 32      | 2809 (GAC>AAC)    | D937N             | 4.3           | 3833  |
| 32      | 2828 (ACT>ATT)    | T943I             | 1.59          | 3833  |
| 6       | 2828 (ACT>ATT)    | T943I             | 1.76          | 5282  |
| 32      | 2924 (ACC>ATC)    | T975I             | 1.67          | 4856  |

## Supplementary Table Legend

**Table S1. Summary of significant mutations identified.** Mutations that were absent in normal tissue but observed in tumor tissue are shown above. Position of nucleotide change in the open-reading frame (ORF) is given.

## Supplementary Figure Legends

**Figure S1. Deletion of RING, NRG and TIER domains of Arkadia in a Smad-dependent reporter assay.** Luciferase reporter assay in HEK293T cells using the Smad-dependent CAGA<sub>12</sub>-Luc reporter. Deletion of the RING ( $\Delta$ RING) and TIER ( $\Delta$ TIER) domains resulted in a potent dominant-negative effect. Deletion of the NRG ( $\Delta$ NRG) domain reduced reporter

readout but did not exert a dominant-negative effect. Three biological repeat experiments were performed, each in quadruplicate.

**Figure S2. Example of a sequencing flowgram representing a single amplicon read from carcinoma tissue of patient 32.** Two putative mutations were deduced from this sample: D937N (4.3 %) and T943I (1.59%) from approximately 4000 reads of this amplicon (upper panel). The bottom three panels show the flowgram data set for a representative read containing the D937N causing mutation. The top flowgram shows the theoretical readout for the reference amplicon. The middle flowgram below shows the G>A substitution that results in the D937N mutation. The bottom flowgram shows reference minus actual read. Homopolymeric false-positives inherent with pyrosequencing are highlighted in pink boxes (upper panel).

Supplementary Fig. 1

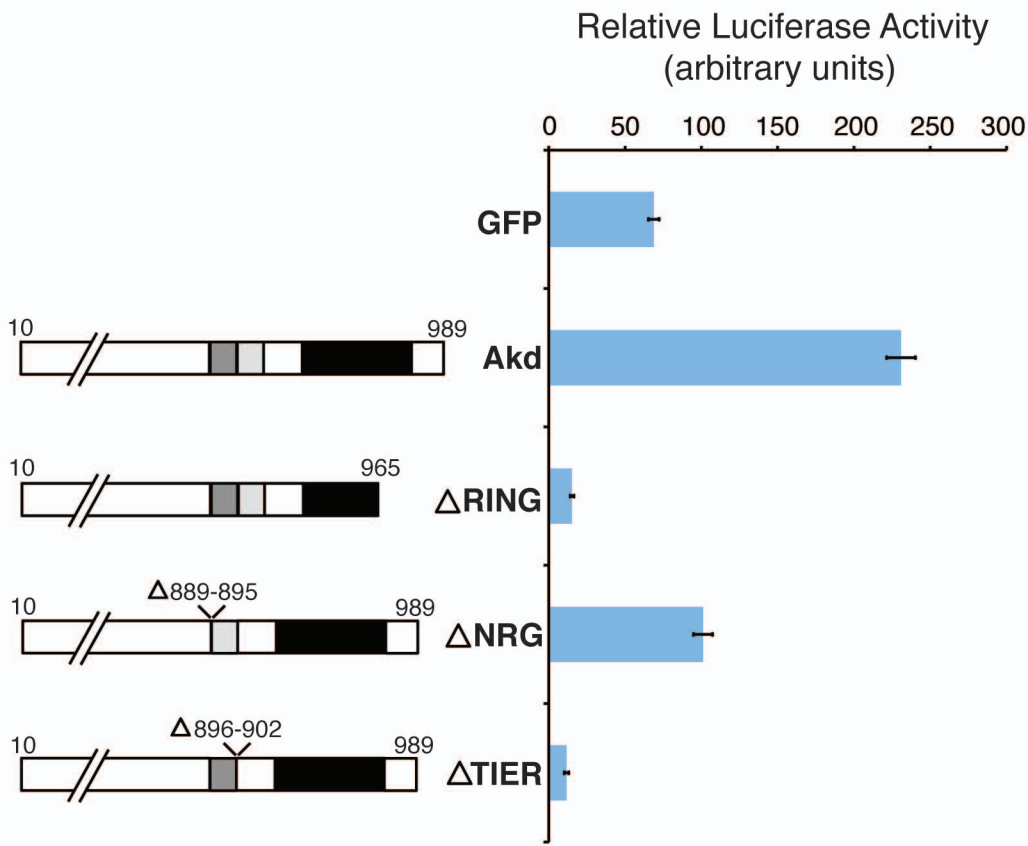

Supplement: NIHMS36355-supplement-1.pdf [file NIHMS36355-supplement-1.pdf]
